Original Article

## Role of *N*-Acetylcysteine in the Treatment of Acute Nonacetaminophen, Nonalcoholic and Nonviral Hepatitis: A Meta-analysis

Waleed Aljohani, MD<sup>1</sup>, Brian Pak Ho Chan, MD<sup>2</sup>, Mohammad Yaghoobi, MD, MSc, AFS, DABIM, FRCPC, FACC<sup>1,2,3</sup>

<sup>1</sup>Department of Medicine, McMaster University, Hamilton, Ontario, Canada; <sup>2</sup>Division of Gastroenterology and Department of Health Research Methods, Evidence, and Impact (HEI), McMaster University, Hamilton, Ontario, Canada; <sup>3</sup>Gastrointestinal Health Technology Assessment Group, The Farncombe Family Digestive Health Research Institute, Hamilton, Ontario, Canada

Correspondence: Mohammad Yaghoobi, MD, MSc, AFS, DABIM, FRCPC, FACC, Department of Medicine, McMaster University, 1280 Main Street West, Hamilton, ON L8S 4K1, Canada, e-mail: [yaghoob@mcmaster.ca](mailto:yaghoob@mcmaster.ca)

### Abstract

**Introduction:** *N*-acetylcysteine (NAC) has been extensively investigated for the use in acetaminophen and alcoholic hepatitis and is indicated in acetaminophen overdose. Studies assessing the effect of NAC on other forms of acute hepatitis in adult patients are limited and therefore here we aimed at evaluating the effect of NAC on survival in nonacetaminophen, nonalcoholic and nonviral hepatitis in adults.

**Methods:** A comprehensive literature search up to September 2019 was completed for randomized controlled trials (RCTs) comparing NAC to placebo in the management of acute nonacetaminophen, nonalcoholic and nonviral hepatitis. Studies with insufficient data, non-RCT or nonprospective design, paediatric studies and studies with no comparator were excluded. Study selection, quality assessment and data extraction were independently performed by two co-authors. Primary outcome was survival. Secondary outcomes were an increase in infection rate. We used random model Mantel–Haenszel meta-analysis with Cochrane risk of bias to assess the quality of included studies. The recommendation was presented using the GRADE framework.

**Results:** Seven out of 42 retrieved studies were included. Study population included patients with post-liver transplant, postsurgical, hypoxia-induced, ischemic and other nonalcoholic hepatitis. There was no difference in overall survival between NAC and placebo (odds ratio [OR] 0.95 [0.55 to 1.62]) in seven studies including 1033 patients. Furthermore, there was no difference in the rate of infection between NAC and placebo (OR 0.87 [0.43 to 1.79]). Random model analysis was used to adjust the effect of statistically significant heterogeneity in both analyses ( $P = 0.02$ ). Lack of blinding in one study was found as a possible source of heterogeneity.

**Conclusions:** NAC does not improve overall survival or the rate of infection in patients with acute nonacetaminophen, nonalcoholic and nonviral hepatitis as compared to placebo and should not be recommended in such setting which may even delay a transplant evaluation (level of evidence: 2a, GRADE of recommendation: B).

**Keywords:** *Acetylcysteine; Acute hepatitis; Cirrhosis; Cohort; Cohort analysis; Hepatitis; Liver failure; Liver transplant; Meta-analysis; NAC; N-acetylcysteine; Prospective study; Random; Randomized controlled trial (RCT)*

## Introduction

N-acetylcysteine (NAC) is an antioxidant that acts to counteract free radicals by increasing intracellular glutathione, especially in the liver (1–4). NAC optimizes cell protection, counterbalancing oxidative stress and inflammation (1–5). There are many clinical diseases have a benefit from NAC therapy, such as obstructive pulmonary disease, cystic fibrosis and systemic sclerosis (6–8). NAC has been extensively investigated for use in acetaminophen-induced hepatitis and is the first-line therapy for acetaminophen overdose (9). In alcoholic hepatitis, NAC infusion improved survival at 1 month when used as an adjuvant to prednisolone in a multicentre randomized controlled trial (RCT) but did not affect long-term mortality (10). Prednisolone and NAC were found to provide the best survival benefit at 28 days in a network meta-analysis (11,12). Despite this, the most recent *American College of Gastroenterology* guideline does not endorse the routine use of NAC given the paucity of studies (12,13). NAC showed no benefit in the treatment of acute viral hepatitis and with the advent of direct-acting antiviral medications, NAC is no longer a consideration in the treatment of viral hepatitis (13). Additional trials have compared the effect of NAC on varying etiologies of hepatitis, including ischemic, drug-induced, postsurgical and peri-transplant hepatitis. In this meta-analysis, we aimed at evaluating the effect of NAC on survival in nonacetaminophen, nonalcoholic and nonviral hepatitis in adults.

## MATERIALS AND METHODS

### Search Strategy

Electronic searches were conducted using OVID MEDLINE, EMBASE, Web of Science, Cochrane Library and Google Scholar. Recursive searches and cross-referencing were carried out by using a “similar articles” function. References of articles identified after initial search were manually reviewed. The search was not restricted to any specific language, abstract or country of origin. The following terms were used: acute hepatitis, liver failure, liver transplant, cirrhosis, hepatitis, acetylcysteine, n-acetylcysteine, cohort analysis, prospective study, cohort, random and randomized controlled trial (RCT).

### Study Selection

All RCTs and prospective cohort studies comparing NAC with placebo in the treatment of nonacetaminophen, nonalcoholic and nonviral hepatitis in adults up to September 2019 were included in this review. Literature search, study selection, data collection and quality assessment were conducted by two independent reviewers (W.A. and B.P.H.C.). A third reviewer (M.Y.) was involved if conflict occurred.

## Types of Outcome

Our primary outcome was survival, but we did not require survival to be the primary outcome of the included studies, as long as it was reported by investigators. Our secondary outcome was rate of infections which was defined as any reported infection during NAC administration.

## Inclusion/Exclusion Criteria

We include RCTs in adult patients with acute hepatitis, not due to acetaminophen, alcohol or viral hepatitis were included. Studies with a secondary treatment, nonextractable data, paediatric studies and duplicate publications were excluded. All studies in which NAC was combined with another therapy were excluded. There were no restrictions on dose, timing and route of administration of NAC.

## Publication Bias

No restrictions were applied in terms of language, country of origin or quality of the studies. A funnel plot model was generated to explore the likelihood of publication bias (Figure 1).

|               | Random sequence generation (selection bias) | Allocation concealment (selection bias) | Blinding of participants and personnel (performance bias) | Blinding of outcome assessment (detection bias) | Incomplete outcome data (attrition bias) | Selective reporting (reporting bias) |
|---------------|---------------------------------------------|-----------------------------------------|-----------------------------------------------------------|-------------------------------------------------|------------------------------------------|--------------------------------------|
| Barkholt 2008 | +                                           | -                                       | -                                                         | -                                               | -                                        | ?                                    |
| Basu 2013     | ?                                           | ?                                       | ?                                                         | ?                                               | ?                                        | ?                                    |
| D'Amico 2013  | +                                           | +                                       | -                                                         | -                                               | -                                        | +                                    |
| Grendar 2016  | -                                           | +                                       | -                                                         | -                                               | -                                        | +                                    |
| Kumar 2017    | ?                                           | -                                       | -                                                         | -                                               | ?                                        | ?                                    |
| Lee 2009      | +                                           | +                                       | +                                                         | +                                               | +                                        | +                                    |
| Nabi 2017     | +                                           | ?                                       | +                                                         | ?                                               | ?                                        | ?                                    |

Figure 1. Risk of bias summary of included studies (green: low risk; yellow: unclear; red: high).

## Reliability

In order to reduce selection bias, two independent reviewers (W.A., B.P.H.C.) performed the search, quality assessment and data extraction. A third reviewer (M.Y.) was involved when a consensus could not be achieved.

## Heterogeneity

Variation in the patient populations, different intervals of follow-up, different primary outcomes of each study and the quality of the studies were considered an a priori source of heterogeneity.

## Quality Assessment

Quality of included studies was assessed using the Cochrane Tool for the Assessment of Risk of Bias for randomized trials. The Cochrane Tool for the Assessment of Risk of Bias addresses specific domains that are assessed as high risk of bias, low risk of bias or unclear including the following seven domains: sequence generation, allocation concealment, blinding of participants and personnel, blinding of outcome assessment, incomplete outcome data, selective outcome reports and other issues (14) (Figure 2).

## Subgroup Analysis

We performed subgroup analysis on trials conducted exclusively on liver failure patients versus those that included all ranges of hepatitis.

## Sensitivity Analysis

Jackknife analysis was performed by excluding each included study by turn to make sure to study has independently affected the result or the heterogeneity.

## Statistical Analysis

A meta-analysis of the pooled relative risk was performed using the Mantel-Haenszel method and Review Manager 5.3 (Version 5.3. Copenhagen: The Nordic Cochrane Centre, The Cochrane Collaboration, 2014). The random effect model was applied. A *P* value of 0.05 was applied as the criterion for statistical significance. The test of heterogeneity was considered

significant if the *P* value was less than 0.10. All results were reported with 95% CI when applicable.

## RESULTS

A total of four abstracts and 44 full texts out of 1264 potential studies were reviewed, among which, seven studies including 1033 patients were included in the final analysis. The included studies included patients with post-liver transplant, postsurgical, hypoxia-induced, ischemic and nonalcoholic acute hepatitis. Additional details and study flow are depicted in a PRISMA flow diagram (Figure 3). Two of the included studies were only presented in abstract form. Table 1 shows the characteristics of the included studies. No visual asymmetry was observed in the Funnel plot. Figure 4 depicts the Funnel plot of the study. Among the seven studies presenting survival rate in a total of 1033 patients, NAC was not statistically different from placebo in improving survival (odds ratio [OR] 0.95 [0.55 to 1.62]; *P* = 0.84). The average survival rate for 1033 individuals with nonacetaminophen, nonviral and nonalcoholic hepatitis was 76.9% (393/511) as compared to 77.2% (403/522) in the placebo group. There was significant heterogeneity associated with this analysis (*P* < 0.02, *I*<sup>2</sup> = 59) (Figure 5). There was no significant change in survival related to the severity of liver condition. Subgroup analysis in hepatitis patients showed that the survival rate was 99.3% (307/309) for those who received NAC as compared to 82.8% (323/390) in the placebo (*P* < 0.29, *I*<sup>2</sup> = 20). In the hepatic failure subgroup, the survival rate was 71.07% (86/121) in the treated patients as compared to 60.6% (80/132) in the control group (*P* < 0.13, *I*<sup>2</sup> = 57) (Figure 5). NAC was not significantly different from placebo in decreasing the rate of infection (OR 1.01 [0.73, 1.39], *P* = 0.71) in three studies including 464 patients. Pooled rate of infection was 30.1% in the NAC group and 31.6% in the control group. This analysis was also associated with significant heterogeneity (*P* < 0.23, *I*<sup>2</sup> = 32%) (Figure 6).

## Sensitivity and Subgroup Analyses

Nabi et al. (19) showed the highest heterogeneity effect and heterogeneity decreased (*I*<sup>2</sup> = 34%) by removing this study in the Jackknife analysis. Furthermore, excluding the study by Grendar

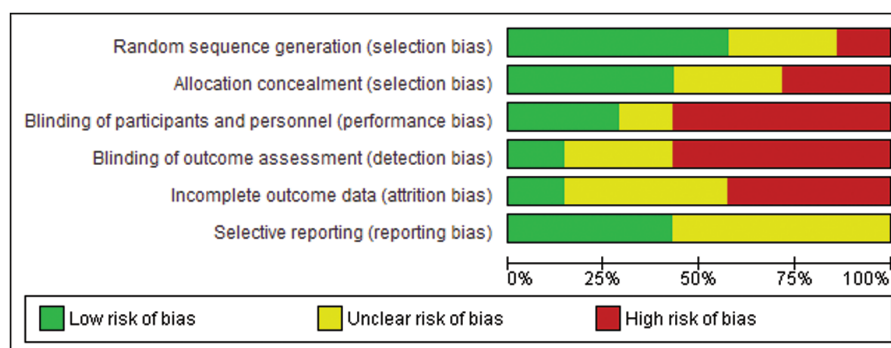

Figure 2. QUADAS-2 analysis, recommended by the Cochrane Collaboration for the assessment of risk of bias in included studies.

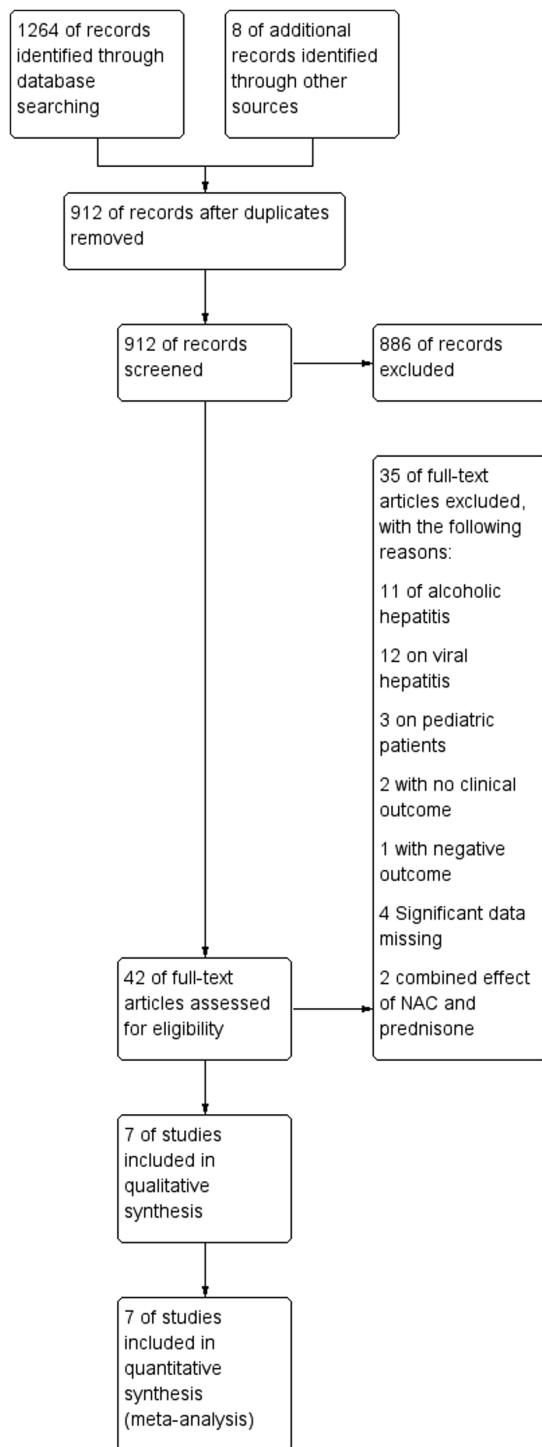

**Figure 3.** PRISMA (preferred reporting items for systematic reviews and meta-analyses) flow diagram of study identification, inclusion and reasons for exclusion.

et al. decreased the heterogeneity from  $I^2 = 20\%$  to  $I^2 = 0\%$ . Lack of blinding and early termination due to higher rate of the development of delirium in case group as compared to the placebo (9.8% and 2.7%,  $P < 0.05$ ) could explain its contribution to heterogeneity. We conducted subgroup analysis based on the presence or absence of liver failure that had no significant effect on heterogeneity.

## Discussion

To our knowledge, this is the first comprehensive systematic review and meta-analysis specifically conducted to address the value of using NAC in patients with nonacetaminophen, nonalcohol and nonviral causes of acute hepatitis. NAC did not improve survival, infectious complications or length of hospital stay in the management of hepatitis not related to acetaminophen, alcohol or viral infection to affect the survival rate. NAC is currently only approved for use in acetaminophen overdose and as a mucolytic (22). Given the proposed mechanisms of action, it has been widely studied (1–4). Our study excluded acetaminophen toxicity, as NAC is already first-line therapy in this condition. Alcoholic hepatitis was excluded as this has been extensively reviewed previously (23,24). Our study looked at post-liver transplant, postsurgical, hypoxia-induced, ischemic and nonalcoholic hepatitis, where there is a paucity of data on the role of NAC. Outside of supportive care as a bridge to transplant, there is a lack of treatment options in our patient population, which was the impetus of our meta-analysis. In the ACG guideline for the management of idiosyncratic drug-induced liver injury (16,25), no definitive therapies were available; however, NAC was listed as a consideration given its good safety profile. While our results do not support the use of NAC, there is a lack of published data and larger studies are required. NAC has been studied in other settings not included in this meta-analysis. In a prospective, multicentre observational study, NAC infusion was administered in acute liver failure patients without clinical or historical evidence of acetaminophen (26). Use of a NAC infusion reduced nonacetaminophen-induced acute liver failure mortality and need for transplantation. In addition, NAC decreased encephalopathy, hospital stay, ICU admission and failure of other organs. An RCT by Pamuk et al., comparing NAC versus controlled group who did not receive any treatment for nonalcoholic steatohepatitis showed an improvement in transaminases over 4 weeks (24).

The main limitation of our meta-analysis was heterogeneity. Significant statistical heterogeneity was present in all analyses and was likely due to clinical heterogeneity such as different aetiologies of hepatitis. We used a random effects model and sensitivity analysis to adjust for heterogeneity. Exclusion of three studies with a high risk of bias significantly reduced heterogeneity. This demonstrated that trial quality was the most likely reason for high heterogeneity.

Clinical heterogeneity is inevitable in meta-analysis especially in those topics where included studies provided controversial results causing statistical heterogeneity. Interestingly, controversial topics may benefit the most from a meta-analysis that could eventually provide more definite conclusion. In an optimal situation, one would like to include studies, which are as similar as possible in methodology, however, due to the nature of meta-analysis being dependent on available studies; this was not possible in our

**Table 1.** Characteristics of included studies

| Study                | Year | Design | Blinding    | Abstract only | Population                     | N (NAC) | N (Placebo) |
|----------------------|------|--------|-------------|---------------|--------------------------------|---------|-------------|
| Barkholt et al. (15) | 2008 | RCT    | No          | No            | Post-ASCT                      | 72      | 88          |
| Lee et al. (16)      | 2009 | RCT    | Double      | No            | Nonacetaminophen liver failure | 81      | 92          |
| Basu et al. (17)     | 2013 | RCT    | Unspecified | Yes           | HILI                           | 30      | 30          |
| D'Amico et al. (18)  | 2013 | RCT    | Single      | No            | LT—donor                       | 69      | 71          |
| Nabi et al. (19)     | 2017 | RCT    | No          | No            | Nonacetaminophen liver failure | 40      | 40          |
| Grendar et al. (20)  | 2016 | RCT    | No          | No            | Hepatic resection              | 96      | 110         |
| Kumar et al. (21)    | 2017 | RCT    | No          | Yes           | IH post-variceal bleed         | 107     | 107         |

ASCT, allogeneic stem cell transplant; HILI, hypoxia-induced liver injury; IH, ischemic hepatitis; LT, liver transplant; N, number; NAC, N-acetylcysteine; RCT, randomized controlled trial.

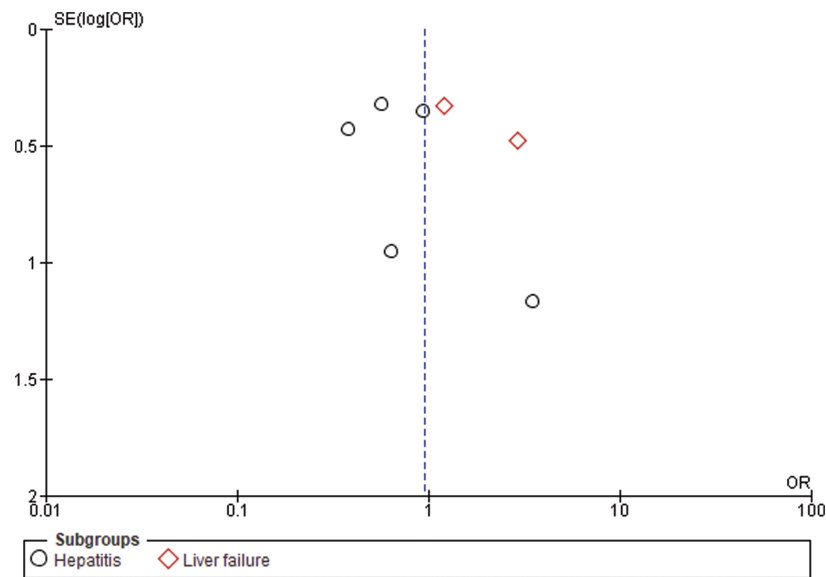

**Figure 4.** Funnel plot of included studies for the primary outcome of survival. SE = standard error; OR = odds ratio.

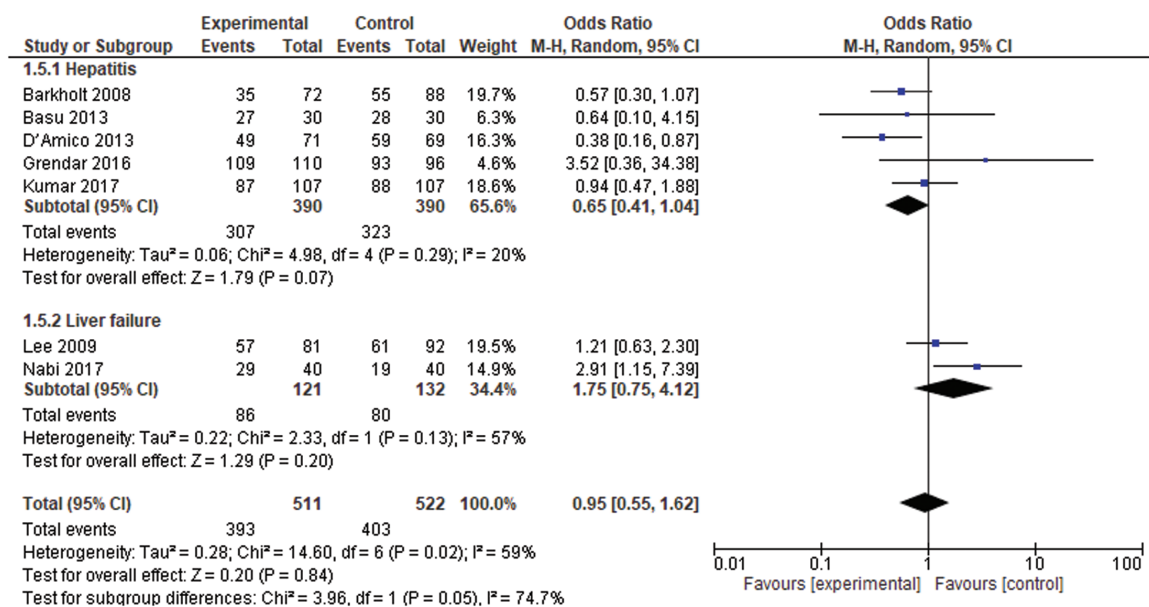

**Figure 5.** Forrest plot of included studies for overall survival. CI = confidence interval.

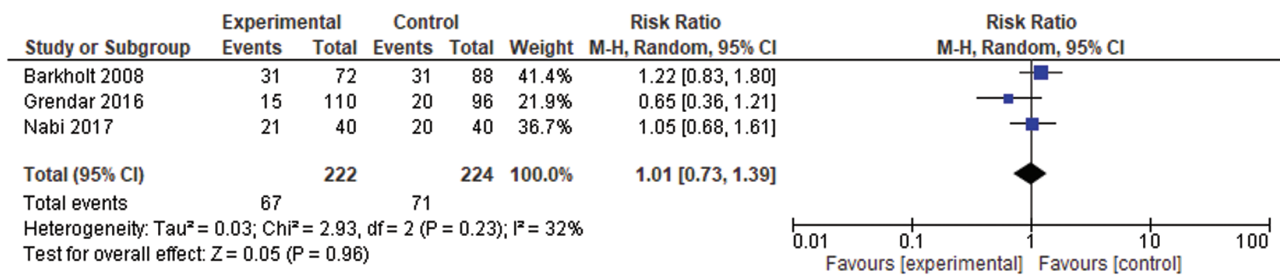

Figure 6. Forrest plot of included studies for rate of infection. CI = confidence interval.

study. We attempted a subgroup analysis but we were not able to explain heterogeneity based on severity of disease in the included patients. Our Jackknife analysis showed that removing the study by Nabi et al. had the highest improvement in heterogeneity (19). This could have been related to the following factors: (i) Acetaminophen-induced hepatitis was excluded based on history with no biochemical confirmation. (ii) The duration of follow-up used to establish the survival rate was based on hospital admission until discharge from the hospital with no further follow-up. Also higher risk of bias might have been a source for heterogeneity since it decreased by excluding a nonblinded underpowered study (20). To minimize the effect of heterogeneity we used random model meta-analysis and the results of the meta-analysis remained robust despite high heterogeneity. We optimally would need individual patient data to further scrutinize the effect of heterogeneity and to study the benefit of NAC especially if the etiology could be identified clearly.

In conclusion, our meta-analysis showed no benefit in the use of NAC in the treatment of nonacetaminophen, nonviral, non-alcoholic hepatitis unless a high-quality study proves otherwise in the future. The studies included were of high heterogeneity with moderate risk of bias. Administering NAC should not be a substitute for early referral to a transplant centre for any patient demonstrating evidence of hepatic failure.

## Funding

Dr. Yaghoobi's research is partly supported by an Internal Career Award by the Department of Medicine at McMaster University.

## References

- Barth SA, Inselmann G, Engemann R, Heidemann HT. Influences of Ginkgo biloba on cyclosporin A induced lipid peroxidation in human liver microsomes in comparison to vitamin E, glutathione and N-acetylcysteine. *Biochem Pharmacol* 1991;41(10):1521-6.
- Yormaz S, Bulbuloglu E, Kurutas EB, et al. The comparison of the effects of hepatic regeneration after partial hepatectomy, silybum marianum, propofol, N-acetylcysteine and vitamin E on liver. *Bratisl Lek Listy* 2012;113(3):145-51.
- Harrison P, Wendon J, Williams R. Evidence of increased guanylate cyclase activation by acetylcysteine in fulminant hepatic failure. *Hepatology* 1996;23(5):1067-72.
- Ribeiro G, Roehrs M, Bairos A, et al. N-acetylcysteine on oxidative damage in diabetic rats. *Drug Chem Toxicol* 2011;34(4):467-74.

- Kerksick C, Willoughby D. The antioxidant role of glutathione and N-acetylcysteine supplements and exercise-induced oxidative stress. *J Int Soc Sports Nutr* 2005;2:38-44.
- Moura FA, de Andrade KQ, Dos Santos JCF, et al. Antioxidant therapy for treatment of inflammatory bowel disease: Does it work? *Redox Biol* 2015;6:617-39.
- Li J, Zhang S, Wu Y, et al. Protective effects of N-acetylcysteine on the liver of brain-dead Ba-Ma mini pig. *Transplant Proc* 2010;42(1):195-9.
- de Andrade KQ, Moura FA, dos Santos JM, et al. Oxidative stress and inflammation in hepatic diseases: Therapeutic possibilities of N-acetylcysteine. *Int J Mol Sci* 2015;16(12):30269-308.
- Smilkstein MJ, Bronstein AC, Linden C, et al. Acetaminophen overdose: A 48-hour intravenous N-acetylcysteine treatment protocol. *Ann Emerg Med* 1991;20(10):1058-63.
- Nguyen-Khac E, Thevenot T, Piquet MA, et al.; AAH-NAC Study Group. Glucocorticoids plus N-acetylcysteine in severe alcoholic hepatitis. *N Engl J Med* 2011;365(19):1781-9.
- Singh S, Murad MH, Chandar AK, et al. Comparative effectiveness of pharmacological interventions for severe alcoholic hepatitis: A systematic review and network meta-analysis. *Gastroenterology* 2015;149(4):958-70.e12.
- Singal AK, Bataller R, Ahn J, et al. ACG clinical guideline: Alcoholic liver disease. *Am J Gastroenterol* 2018;113(2):175-94.
- Gunduz H, Karabay O, Tamer A, et al. N-acetyl cysteine therapy in acute viral hepatitis. *World J Gastroenterol* 2003;9(12):2698-700.
- RoB 2: A revised Cochrane risk-of-bias tool for randomized trials [Internet]. [cited 2019 October 13]. <https://methods.cochrane.org/bias/resources/rob-2-revised-cochrane-risk-bias-tool-randomized-trials>.
- Barkholt L, Remberger M, Hassan Z, et al. A prospective randomized study using N-acetyl-L-cysteine for early liver toxicity after allogeneic hematopoietic stem cell transplantation. *Bone Marrow Transplant* 2008;41(9):785-90.
- Lee WM, Hyman LS, Rossaro L, et al.; Acute Liver Failure Study Group. Intravenous N-acetylcysteine improves transplant-free survival in early stage non-acetaminophen acute liver failure. *Gastroenterology* 2009;137(3):856-64.e1.
- Basu P, Mittmanj K, Shah NJ, et al. Effect of n-acetylcysteine (NAC) in hypoxia induced liver injury (HILI)—A randomized placebo control clinical trial. *J Clin Exp Hepatol* 2013;3(1):S122.
- D'Amico F, Vitale A, Piovano D, et al. Use of N-acetylcysteine during liver procurement: A prospective randomized controlled study. *Liver Transpl* 2013;19(2):135-44.
- Nabi T, Nabi S, Rafiq N, et al. Role of N-acetylcysteine treatment in non-acetaminophen-induced acute liver failure: A prospective study. *Saudi J Gastroenterol* 2017;23(3):169-75.
- Grendar J, Ouellet JF, McKay A, et al. Effect of N-acetylcysteine on liver recovery after resection: A randomized clinical trial. *J Surg Oncol* 2016;114(4):446-50.
- Kumar A, Jindal A, Maiwall R, Anand L, Sahney A, Sarin SK. Ischemic hepatitis following acute variceal bleed is ameliorated by N-acetylcysteine (NAC) in cirrhotics: A prospective randomized controlled trial. *Hepatology* 2015;62:283A.
- Pela R, Calcagni AM, Subiaco S, et al. N-acetylcysteine reduces the exacerbation rate in patients with moderate to severe COPD. *Respiration* 1999;66(6):495-500.
- Torok NJ. Update on alcoholic hepatitis. *Biomolecules* 2015;5(4):2978-86.
- Pamuk GE, Sonsuz A. N-acetylcysteine in the treatment of non-alcoholic steatohepatitis. *J Gastroenterol Hepatol* 2003;18(10):1220-1.
- Chalasan NP, Hayashi PH, Bonkovsky HL, et al.; Practice Parameters Committee of the American College of Gastroenterology. ACG clinical guideline: The diagnosis and management of idiosyncratic drug-induced liver injury. *Am J Gastroenterol* 2014;109(7):950-66; quiz 967.
- Darweesh SK, Ibrahim MF, El-Tahawy MA. Effect of N-acetylcysteine on mortality and liver transplantation rate in non-acetaminophen-induced acute liver failure: A multicenter study. *Clin Drug Investig* 2017;37(5):473-82.
